# Supplementary material
Source: PubMed Central journal article supplement (PMC2761014)
Supplement: NIHMS133542-supplement-1_si_001.pdf [file NIHMS133542-supplement-1_si_001.pdf]

## Supplemental Table 1

| MC F-7 N-linked glycosylated proteins              | MH+        | z | Peptide                       | XC   | Ions   |
|----------------------------------------------------|------------|---|-------------------------------|------|--------|
| afamin precursor                                   | 1588.77478 | 2 | -.GQCIIINSN#KDDRPK.-          | 2.61 | 18/26  |
| hypothetical protein LOC9768 isoform 1             | 1715.84463 | 2 | K.EN#QIPEEAGSSGLGKAK.R        | 2.17 | 13/32  |
| keratin 18                                         | 2687.37089 | 3 | R.YALQM*EQLN#GILLHLESELAQTR.A | 5.07 | 42/88  |
| H2B histone family, member C                       | 1776.79313 | 2 | K.AM*GIM*N#SFVN#DIFER.I       | 2.69 | 14/28  |
| H2B histone family, member C                       | 1776.79313 | 2 | -.AM*GIM*N#SFVN#DIFER.-       | 3.35 | 15/28  |
| tankyrase                                          | 975.51055  | 2 | -.GAN#NEKTK.-                 | 2.25 | 14/ 16 |
| tRNA splicing endonuclease 2 homolog               | 1726.73708 | 2 | -.LN#SGM*VSNMEGTAGGER.-       | 2.40 | 11/ 32 |
| MDA-MB-453 N-linked glycosylated proteins          | MH+        | z | Peptide                       | XC   | Ions   |
| afamin precursor                                   | 1588.77478 | 2 | R.GQCIINSN#KDDRPK.D           | 2.42 | 18/26  |
| Kinesin-like protein KIF1B (Klp)                   | 1306.60624 | 2 | K.N#GATHYWSLEK.L              | 2.08 | 12/ 20 |
| transducer of ERBB2, 2                             | 1558.85156 | 2 | -.VALN#FIISYL YNK.-           | 2.05 | 10/ 24 |
| valosin-containing protein                         | 1800.78911 | 2 | K.MTN#GFSGADLTEIC@QR.A        | 4.82 | 21/30  |
| Heterogeneous nuclear ribonucleoprotein L          | 1730.77240 | 2 | K.ASLN#GADIYSGC@C@TLK.I       | 3.65 | 20/30  |
| glyceraldehyde-3-phosphate dehydrogenase           | 1764.78639 | 2 | -.LISWYDNEFGYSN#R.-           | 2.59 | 15/26  |
| keratin 18                                         | 2671.37698 | 3 | R.YALQMEQLN#GILLHLESELAQTR.A  | 5.59 | 40/88  |
| serine (or cysteine) proteinase inhibitor, clade A | 1856.96152 | 3 | -.FN#KPFVFLMIEQNTK.-          | 3.43 | 27/56  |
| tRNA splicing endonuclease 2 homolog               | 1726.73708 | 2 | -.LN#SGM*VSNMEGTAGGER.-       | 2.23 | 11/ 32 |
| hypothetical protein LOC9768 isoform 1             | 1715.84463 | 2 | K.EN#QIPEEAGSSGLGKAK.R        | 2.22 | 15/ 32 |
| H2B histone family, member C                       | 1776.79313 | 2 | -.AM*GIM*N#SFVN#DIFER.-       | 4.49 | 22/28  |
| H2B histone family, member C                       | 1745.78732 | 2 | K.AMGIMN#SFVN#DIFER.I         | 4.81 | 22/28  |
| H2B histone family, member C                       | 1744.80330 | 2 | K.AMGIMNSFVN#DIFER.I          | 5.37 | 23/28  |
| MDA-MB-468 N-glycosylated proteins                 | MH+        | z | Peptide                       | XC   | Ions   |
| tRNA splicing endonuclease 2 homolog               | 1726.73708 | 2 | -.LN#SGM*VSNMEGTAGGER.-       | 2.40 | 12/ 32 |
| tankyrase                                          | 975.51055  | 2 | -.GAN#NEKTK.-                 | 2.25 | 11/ 16 |
| furry homolog                                      | 929.54146  | 2 | -.KAVDN#LR.-                  | 2.01 | 9/ 14  |

Supplemental Table 1: Deaminated peptides found outside the NXS/T motif typically found with N-linked glycosylation.

# Supplemental Figure 1

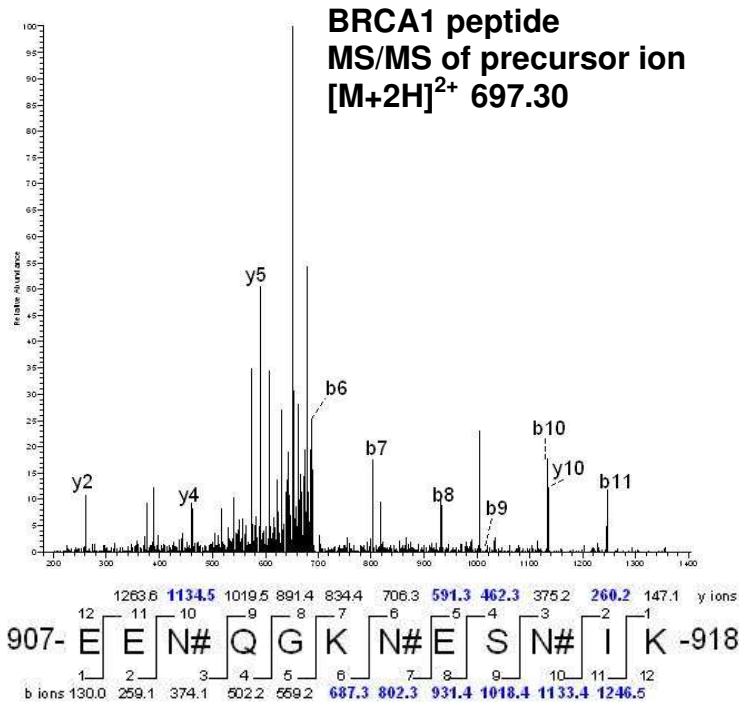

Supplemental Figure 1. MS/MS data of BRCA1 peptide demonstrating the N-linked glycosylation site (#=deaminated asparagines). The parent ion had a measurement error less than 2 ppm.

## Supplemental Figure 2

### A. Keratin18 YALQMEQLN#GILLHLESELAQTR Xcorr 5.071 44/88 ions

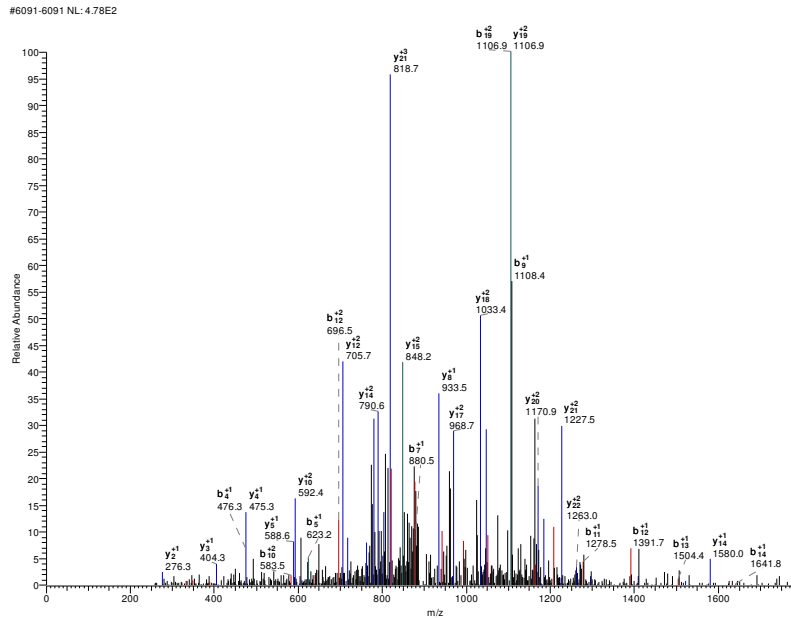

|    | AA | B ions      | Y ions      |    |
|----|----|-------------|-------------|----|
| 1  | Y  | 164.070605  | -           | 23 |
| 2  | A  | 235.1077188 | 2524.307574 | 22 |
| 3  | L  | 348.1917827 | 2453.27046  | 21 |
| 4  | Q  | 476.2503602 | 2340.186396 | 20 |
| 5  | M* | 623.2857648 | 2212.127818 | 19 |
| 6  | E  | 752.3283579 | 2065.092414 | 18 |
| 7  | Q  | 880.3869354 | 1936.049821 | 17 |
| 8  | L  | 993.4709994 | 1807.991243 | 16 |
| 9  | N# | 1108.497947 | 1694.907179 | 15 |
| 10 | G  | 1165.519411 | 1579.890232 | 14 |
| 11 | I  | 1278.603475 | 1522.868768 | 13 |
| 12 | L  | 1391.687538 | 1409.774704 | 12 |
| 13 | L  | 1504.771602 | 1296.69064  | 11 |
| 14 | H  | 1641.830514 | 1183.606576 | 10 |
| 15 | L  | 1754.914578 | 1046.547664 | 9  |
| 16 | E  | 1883.957171 | 933.4636004 | 8  |
| 17 | S  | 1970.9892   | 804.4210073 | 7  |
| 18 | E  | 2100.031793 | 717.3889789 | 6  |
| 19 | L  | 2213.115857 | 588.3463859 | 5  |
| 20 | A  | 2284.152971 | 475.2623219 | 4  |
| 21 | Q  | 2412.211548 | 404.2252081 | 3  |
| 22 | T  | 2513.259227 | 276.1666306 | 2  |
| 23 | R  | -           | 175.1189522 | 1  |

### B. H2B histone AMGIMN#SFVNDIFER Xcorr = 4.5 22/28 ions

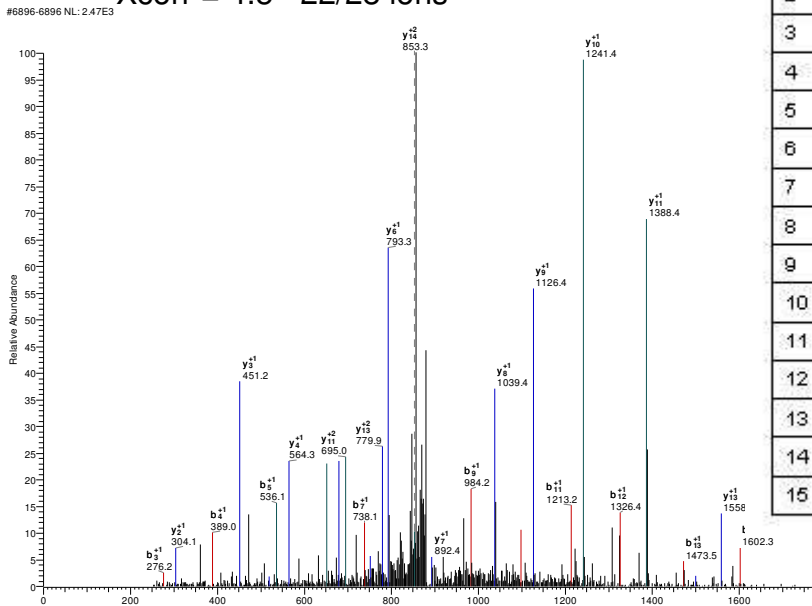

|    | AA | B ions      | Y ions      |    |
|----|----|-------------|-------------|----|
| 1  | A  | 72.04439023 | -           | 15 |
| 2  | M* | 219.0797949 | 1705.756034 | 14 |
| 3  | G  | 276.1012586 | 1558.72063  | 13 |
| 4  | I  | 389.1853225 | 1501.699166 | 12 |
| 5  | M* | 536.2207272 | 1388.615102 | 11 |
| 6  | N# | 651.2476746 | 1241.579697 | 10 |
| 7  | S  | 738.279703  | 1126.55275  | 9  |
| 8  | F  | 885.3481169 | 1039.520721 | 8  |
| 9  | V  | 984.4165308 | 892.4523075 | 7  |
| 10 | N  | 1098.469468 | 793.3838936 | 6  |
| 11 | D  | 1213.496401 | 679.3409661 | 5  |
| 12 | I  | 1326.570465 | 564.3140231 | 4  |
| 13 | F  | 1473.638679 | 451.2299591 | 3  |
| 14 | E  | 1602.681472 | 304.1615452 | 2  |
| 15 | R  | -           | 175.1189522 | 1  |

Supplemental Figure 2 A) The MS/MS data of keratin 18 peptide demonstrating the N-linked glycosylation site outside the NXS/T motif (#=deaminated asparagines; \*=oxidized methionine). The MS/MS data had a Xcorr 5.071 and matched 44 out of 88 ions. B) The MS/MS data of H2B Histone peptide demonstrating the N-linked glycosylation site outside the NXS/T motif. The MS/MS data had a Xcorr = 4.5 and matched 22 out of 28 ions.

## Supplemental figure 3

### MCF-7 crude membrane ion map

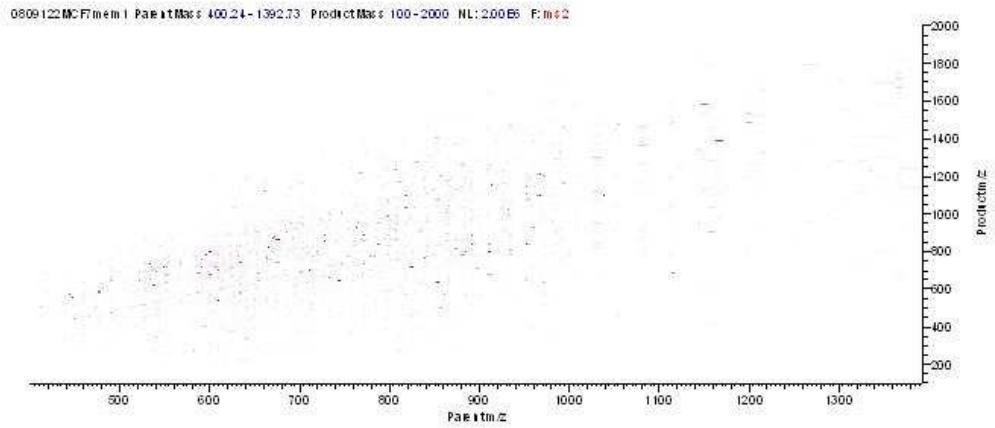

### MDA-MB-453 crude membrane ion map

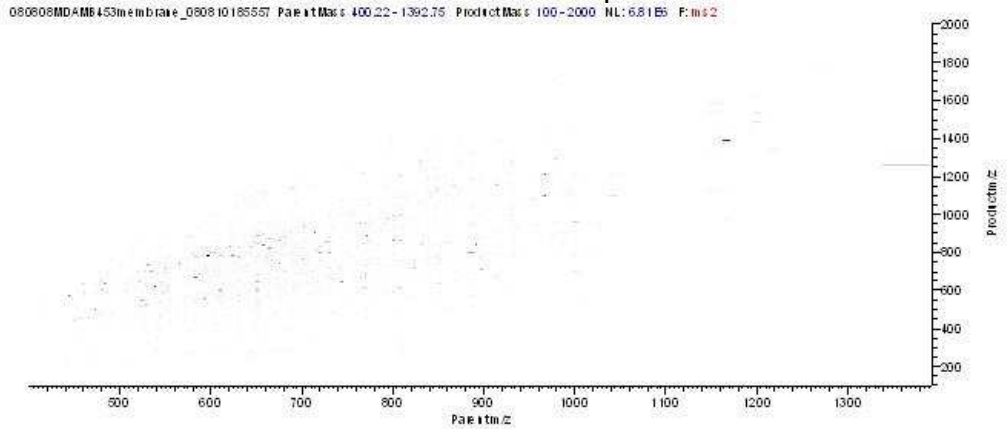

### MDA-MB-468 crude membrane ion map

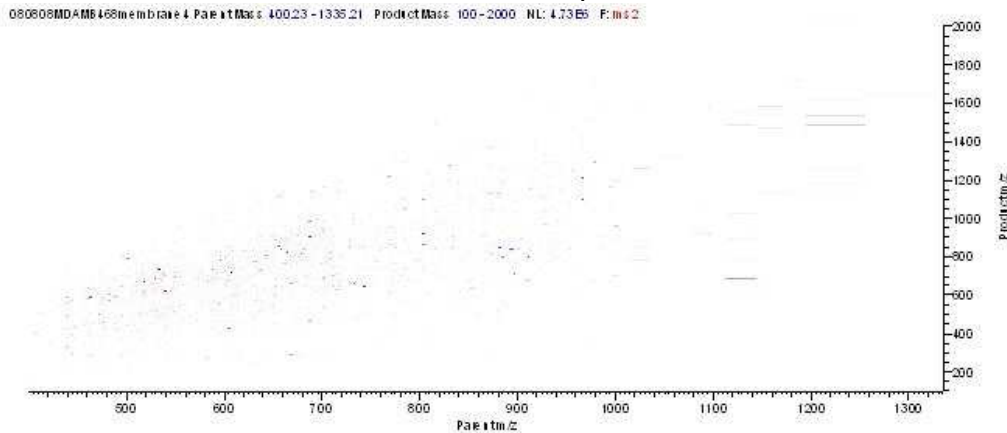

Supplemental Figure 3. Representative 2-D ion maps of MCF-7, MDA-MB-453, and MDA-MB-468 crude membrane samples.
