# Supplementary material
Source: PubMed Central journal article supplement (PMC2761014)
Supplement: NIHMS133542-supplement-2_si_002.pdf [file NIHMS133542-supplement-2_si_002.pdf]

Supplemental Table 2

Breast Cancer Membrane, Samples Report created on 11/30/2008

| #  | Identified Proteins (420)                          | Accession Number                   | M W     | MCF-7 | MDA-MB-231 | MDA-MB-453 | MDA-MB-468 |
|----|----------------------------------------------------|------------------------------------|---------|-------|------------|------------|------------|
| 1  | H2B histone family, member C                       | gi 4504259 ref NP_003510.1  H2B    | 14 kDa  | 163   | 114        | 192        | 276        |
| 2  | H4 histone family, member A                        | gi 4504301 ref NP_003529.1  H4 h   | 11 kDa  | 177   | 140        | 136        | 252        |
| 3  | beta-tubulin - human                               | gi 2119276 pir  38369 beta-tubulin | 49 kDa  | 123   | 134        | 180        | 117        |
| 4  | keratin 8                                          | gi 4504919 ref NP_002264.1  kera   | 54 kDa  | 304   | 55         | 77         | 40         |
| 5  | vimentin                                           | gi 62414289 ref NP_003371.2  vim   | 54 kDa  | 0     | 473        | 0          | 0          |
| 6  | heat shock 70kDa protein 5                         | gi 16507237 ref NP_005338.1  hea   | 72 kDa  | 123   | 141        | 89         | 103        |
| 7  | heterogeneous nuclear ribonucleoprotein A2/B1 iso  | gi 14043072 ref NP_112533.1  het   | 37 kDa  | 105   | 56         | 136        | 156        |
| 8  | chaperonin                                         | gi 31542947 ref NP_002147.2  cha   | 61 kDa  | 113   | 33         | 151        | 122        |
| 9  | H2A histone family, member A                       | gi 10645195 ref NP_066390.1  H2    | 14 kDa  | 118   | 105        | 98         | 89         |
| 10 | heat shock 70kDa protein 8 isoform 1               | gi 5729877 ref NP_006588.1  heat   | 71 kDa  | 109   | 96         | 110        | 91         |
| 11 | valosin-containing protein                         | gi 6005942 ref NP_009057.1  valos  | 89 kDa  | 48    | 74         | 138        | 137        |
| 12 | tubulin alpha 6                                    | gi 14389309 ref NP_116093.1  tub   | 50 kDa  | 78    | 119        | 118        | 58         |
| 13 | Chain A, Cyclophilin A Complexed With Dipeptide    | gi 1633054 pdb 5CYH A Chain A, C   | 18 kDa  | 68    | 68         | 81         | 126        |
| 14 | myosin, heavy polypeptide 9, non-muscle            | gi 12667788 ref NP_002464.1  my    | 227 kDa | 3     | 196        | 78         | 58         |
| 15 | Actin IN Complex With Human Gelsolin Segment       | gi 7245526 pdb 1DEJ A Chain A, C   | 42 kDa  | 67    | 45         | 73         | 128        |
| 16 | Keratin, type I cytoskeletal 19                    | gi 90111766 sp P08727 K1C19_H      | 44 kDa  | 115   | 25         | 74         | 86         |
| 17 | The Two Rna-Recognition Motif Domain Of Hnmp       | gi 20664272 pdb 1L3K A Chain A,    | 22 kDa  | 87    | 70         | 77         | 89         |
| 18 | glyceraldehyde-3-phosphate dehydrogenase           | gi 7669492 ref NP_002037.2  glyce  | 36 kDa  | 90    | 64         | 88         | 53         |
| 19 | heterogeneous nuclear ribonucleoprotein K          | gi 13384620 ref NP_079555.1  het   | 51 kDa  | 78    | 57         | 67         | 83         |
| 20 | Vitamin D-Binding Protein In Complex With Skeleta  | gi 21730554 pdb 1KXP A Chain A,    | 42 kDa  | 50    | 59         | 51         | 106        |
| 21 | nucleolin                                          | gi 55956788 ref NP_005372.2  nuc   | 77 kDa  | 65    | 44         | 82         | 55         |
| 22 | Fatty acid synthase S-acetyltransferase            | gi 67476453 sp P49327 FAS_HUM      | 273 kDa | 86    | 17         | 111        | 32         |
| 23 | keratin 18                                         | gi 4557888 ref NP_000215.1  kera   | 48 kDa  | 150   | 35         | 29         | 20         |
| 24 | Filamin-A                                          | gi 116241365 sp P21333 FLNA_H      | 281 kDa | 0     | 40         | 95         | 99         |
| 25 | ATP synthase, H+ transporting,                     | gi 32189394 ref NP_001677.2  AT    | 57 kDa  | 85    | 27         | 80         | 28         |
| 26 | H3 histone, family 3A                              | gi 4504279 ref NP_002098.1  H3 h   | 15 kDa  | 46    | 39         | 40         | 96         |
| 27 | ribosomal protein L4                               | gi 16579885 ref NP_000959.2  rib   | 48 kDa  | 83    | 52         | 29         | 60         |
| 28 | heat shock 90kDa protein 1                         | gi 20149594 ref NP_031381.2  hea   | 83 kDa  | 74    | 48         | 55         | 37         |
| 29 | nucleophosmin 1 isoform 1                          | gi 10835063 ref NP_002511.1  nuc   | 33 kDa  | 67    | 45         | 35         | 60         |
| 30 | Heterogeneous nuclear ribonucleoprotein U          | gi 126302554 sp Q00839 HNRPU       | 91 kDa  | 57    | 34         | 55         | 61         |
| 31 | pyruvate kinase 3 isoform 1                        | gi 33286418 ref NP_002645.3  pyr   | 58 kDa  | 54    | 105        | 21         | 28         |
| 32 | annexin A2 isoform 2                               | gi 4757756 ref NP_004030.1  anne   | 39 kDa  | 4     | 117        | 29         | 59         |
| 33 | ribosomal protein S7                               | gi 4506741 ref NP_001002.1  ribos  | 22 kDa  | 60    | 53         | 38         | 52         |
| 34 | lamin A/C isoform 1 precursor                      | gi 27436946 ref NP_733821.1  lam   | 74 kDa  | 38    | 56         | 39         | 56         |
| 35 | eukaryotic translation elongation factor 1 alpha   | gi 4503471 ref NP_001393.1  euka   | 50 kDa  | 19    | 60         | 57         | 40         |
| 36 | heat shock 27kDa protein 1                         | gi 4504517 ref NP_001531.1  heat   | 23 kDa  | 118   | 16         | 16         | 18         |
| 37 | heterogeneous nuclear ribonucleoprotein A3         | gi 34740329 ref NP_919223.1  het   | 40 kDa  | 29    | 31         | 47         | 62         |
| 38 | Aldolase A                                         | gi 229674 pdb 1ALD  Chain , Ald    | 39 kDa  | 45    | 16         | 79         | 19         |
| 39 | Human mRNA, complete cds                           | gi 348239 gb AAC37578.1  [Hum      | 54 kDa  | 29    | 25         | 46         | 55         |
| 40 | ribosomal protein P2                               | gi 4506671 ref NP_000995.1  ribos  | 12 kDa  | 51    | 39         | 37         | 27         |
| 41 | H2A histone family member                          | gi 18105045 ref NP_542163.1  H2    | 14 kDa  | 32    | 34         | 29         | 54         |
| 42 | ribosomal protein L7                               | gi 15431301 ref NP_000962.2  rib   | 29 kDa  | 51    | 30         | 31         | 36         |
| 43 | ribosomal protein L8                               | gi 4506663 ref NP_000964.1  ribos  | 28 kDa  | 51    | 28         | 20         | 39         |
| 44 | heterogeneous nuclear ribonucleoprotein C isoform  | gi 117189975 ref NP_112604.2  he   | 34 kDa  | 33    | 24         | 35         | 49         |
| 45 | H2A histone family, member Z                       | gi 4504255 ref NP_002097.1  H2A    | 14 kDa  | 14    | 24         | 43         | 55         |
| 46 | heterogeneous nuclear ribonucleoprotein C-like 1   | gi 61966711 ref NP_001013653.1     | 32 kDa  | 36    | 19         | 33         | 53         |
| 47 | heat shock 70kDa protein 2                         | gi 13676857 ref NP_068814.2  hea   | 70 kDa  | 39    | 25         | 40         | 35         |
| 48 | tubulin, beta 4                                    | gi 21361322 ref NP_006078.2  tub   | 50 kDa  | 31    | 36         | 41         | 23         |
| 49 | myosin, light chain 6,                             | gi 17986258 ref NP_066299.2  my    | 17 kDa  | 11    | 53         | 34         | 31         |
| 50 | Peptidyl-prolyl cis-trans isomerase B              | gi 118090 sp P23284 PPIB_HUMA      | 23 kDa  | 41    | 15         | 42         | 31         |
| 51 | heterogeneous nuclear ribonucleoprotein D isoform  | gi 14110420 ref NP_112738.1  het   | 38 kDa  | 25    | 33         | 38         | 31         |
| 52 | protein disulfide isomerase-associated 3 precursor | gi 21361657 ref NP_005304.3  pro   | 57 kDa  | 19    | 13         | 56         | 37         |
| 53 | Plectin-1 (PLTN) (PCN) ]                           | gi 134044255 sp Q15149 PLEC1       | ?       | 3     | 110        | 10         | 0          |
| 54 | heterogeneous nuclear ribonucleoprotein R          | gi 5031755 ref NP_005817.1  hete   | 71 kDa  | 28    | 24         | 25         | 44         |
| 55 | histone cluster 1, H1a                             | gi 4885373 ref NP_005316.1  histo  | 22 kDa  | 35    | 29         | 17         | 33         |
| 56 | cofilin 1                                          | gi 5031635 ref NP_005498.1  cofil  | 19 kDa  | 13    | 24         | 50         | 27         |
| 57 | eukaryotic translation elongation factor 1 delta   | gi 25453472 ref NP_001951.2  euk   | 31 kDa  | 21    | 36         | 33         | 27         |
| 58 | ribosomal protein S3a                              | gi 4506723 ref NP_000997.1  ribos  | 30 kDa  | 42    | 24         | 23         | 28         |
| 59 | D- Glyceraldehyde-3-Phosphate Dehydrogenase        | gi 230867 pdb 3GPD R Chain R, T    | 36 kDa  | 33    | 25         | 31         | 23         |
| 60 | heterogeneous nuclear ribonucleoprotein M isoform  | gi 14141152 ref NP_005959.2  het   | 78 kDa  | 29    | 18         | 35         | 31         |
| 61 | actinin, alpha 1                                   | gi 4501891 ref NP_001093.1  actin  | 103 kDa | 12    | 45         | 31         | 24         |
| 62 | solute carrier family 3                            | gi 61744483 ref NP_001013269.1     | 58 kDa  | 101   | 5          | 0          | 3          |
| 63 | Heat shock 70 kDa protein 1                        | gi 147744565 sp P08107 HSP71_H     | 70 kDa  | 54    | 8          | 24         | 24         |
| 64 | ribosomal protein S4, X-linked X isoform           | gi 4506725 ref NP_000998.1  ribos  | 30 kDa  | 29    | 39         | 16         | 29         |
| 65 | prolyl 4-hydroxylase, beta                         | gi 20070125 ref NP_000909.2  pro   | 57 kDa  | 24    | 20         | 38         | 24         |
| 66 | ribosomal protein L24                              | gi 4506619 ref NP_000977.1  ribos  | 18 kDa  | 24    | 23         | 26         | 34         |
| 67 | glial fibrillary acidic protein                    | gi 4503979 ref NP_002046.1  glial  | 50 kDa  | 94    | 0          | 6          | 4          |
| 68 | calnexin precursor                                 | gi 10716563 ref NP_001737.1  caln  | 68 kDa  | 32    | 34         | 16         | 19         |
| 69 | ribosomal protein S8                               | gi 4506743 ref NP_001003.1  ribos  | 24 kDa  | 27    | 18         | 13         | 38         |

|     |                                                   |                                    |       |         |    |    |    |    |
|-----|---------------------------------------------------|------------------------------------|-------|---------|----|----|----|----|
| 70  | ribosomal protein S6                              | gi 6677809 ref NP_033122.1         | ribos | 29 kDa  | 19 | 20 | 21 | 37 |
| 71  | heat shock 70kDa protein 6]                       | gi 34419635 ref NP_002146.2        | hea   | 71 kDa  | 72 | 35 | 42 | 37 |
| 72  | ribosomal protein S5                              | gi 13904870 ref NP_001000.2        | ribc  | 23 kDa  | 32 | 19 | 16 | 29 |
| 73  | transketolase                                     | gi 4507521 ref NP_001055.1         | trans | 68 kDa  | 19 | 17 | 38 | 18 |
| 74  | ribosomal protein S13                             | gi 4506685 ref NP_001008.1         | ribos | 17 kDa  | 27 | 24 | 14 | 30 |
| 75  | N-acetylglucosamine-specific receptor 1 precursor | gi 627551 pir  A54770 N-acetylgluc |       | 52 kDa  | 12 | 11 | 39 | 32 |
| 76  | chaperonin containing TCP1                        | gi 4502643 ref NP_001753.1         | chape | 58 kDa  | 23 | 16 | 31 | 23 |
| 77  | ribophorin I precursor                            | gi 4506675 ref NP_002941.1         | ribop | 69 kDa  | 21 | 21 | 20 | 31 |
| 78  | heat shock 70kDa protein 9B                       | gi 24234688 ref NP_004125.3        | hea   | 74 kDa  | 40 | 7  | 27 | 17 |
| 79  | ATP synthase, H+ transporting                     | gi 4757810 ref NP_004037.1         | ATP   | 60 kDa  | 25 | 8  | 38 | 18 |
| 80  | Muscle L-Lactate Dehydrogenase M Chain            | gi 13786849 pdb 1110 A Chain A, H  |       | 37 kDa  | 10 | 38 | 28 | 11 |
| 81  | ribosomal protein L10a                            | gi 13592009 ref NP_112327.1        | ribc  | 25 kDa  | 30 | 22 | 13 | 22 |
| 82  | Human Vimentin Coil 2b Fragment                   | gi 20149836 pdb 1GK4 A Chain A,    |       | 10 kDa  | 5  | 85 | 0  | 3  |
| 83  | Galectin-1                                        | gi 42542978 pdb 1GZV B Chain B     |       | 15 kDa  | 4  | 57 | 18 | 5  |
| 84  | ribosomal protein L12                             | gi 4506597 ref NP_000967.1         | ribos | 18 kDa  | 28 | 16 | 15 | 23 |
| 85  | ribosomal protein L7a                             | gi 4506661 ref NP_000963.1         | ribos | 30 kDa  | 32 | 23 | 11 | 17 |
| 86  | HSP 90-alpha (HSP 86)                             | gi 92090606 sp P07900 HS90A_H      |       | 85 kDa  | 49 | 17 | 47 | 18 |
| 87  | Heterogeneous nuclear ribonucleoprotein L         | gi 133274 sp P14866 HNRPL_HU       |       | 60 kDa  | 27 | 6  | 22 | 27 |
| 88  | Heterogeneous nuclear ribonucleoprotein A/B       | gi 33112434 sp Q99729 ROAA_HU      |       | 37 kDa  | 30 | 10 | 28 | 14 |
| 89  | ribosomal protein S3                              | gi 15718687 ref NP_000996.2        | ribc  | 27 kDa  | 26 | 10 | 23 | 19 |
| 90  | ribosomal protein S10                             | gi 4506679 ref NP_001005.1         | ribos | 19 kDa  | 28 | 24 | 14 | 15 |
| 91  | stress-induced-phosphoprotein 1 (Hsp70/Hsp90-o    | gi 5803181 ref NP_006810.1         | stres | 63 kDa  | 28 | 10 | 24 | 18 |
| 92  | H2B histone family, member R                      | gi 20336754 ref NP_066402.2        | H2B   | 14 kDa  | 17 | 27 | 13 | 20 |
| 93  | ribosomal protein L18                             | gi 4506607 ref NP_000970.1         | ribos | 22 kDa  | 21 | 19 | 13 | 23 |
| 94  | poly A binding protein, cytoplasmic 4             | gi 4504715 ref NP_003810.1         | poly  | 71 kDa  | 21 | 17 | 13 | 26 |
| 95  | tumor rejection antigen (gp96) 1                  | gi 4507677 ref NP_003290.1         | tumc  | 92 kDa  | 16 | 28 | 14 | 20 |
| 96  | ribosomal protein L17                             | gi 4506617 ref NP_000976.1         | ribos | 21 kDa  | 25 | 14 | 9  | 30 |
| 97  | small nuclear ribonucleoprotein polypeptide N     | gi 4507135 ref NP_003088.1         | smal  | 25 kDa  | 20 | 16 | 17 | 23 |
| 98  | enolase 1                                         | gi 4503571 ref NP_001419.1         | enol  | 47 kDa  | 8  | 36 | 18 | 12 |
| 99  | Far upstream element-binding protein 2            | gi 37078468 sp Q92945 FUBP2_H      |       | 73 kDa  | 20 | 14 | 30 | 6  |
| 100 | ribosomal protein L23                             | gi 4506605 ref NP_000969.1         | ribos | 15 kDa  | 24 | 19 | 9  | 18 |
| 101 | leucine rich repeat containing 59                 | gi 40254924 ref NP_060979.2        | leuc  | 35 kDa  | 21 | 24 | 19 | 8  |
| 102 | ribosomal protein P1 isoform 1                    | gi 4506669 ref NP_000994.1         | ribos | 12 kDa  | 22 | 11 | 23 | 11 |
| 103 | ribosomal protein S18                             | gi 6755368 ref NP_035426.1         | ribos | 18 kDa  | 21 | 16 | 18 | 15 |
| 104 | chaperonin containing TCP1                        | gi 63162572 ref NP_005989.3        | chape | 61 kDa  | 16 | 12 | 25 | 16 |
| 105 | matrin 3                                          | gi 21626466 ref NP_061322.2        | ma    | 95 kDa  | 20 | 7  | 27 | 12 |
| 106 | interleukin enhancer binding factor 3 isoform a   | gi 24234750 ref NP_036350.1        | inte  | 95 kDa  | 14 | 13 | 13 | 27 |
| 107 | heterogeneous nuclear ribonucleoprotein D-like    | gi 14110407 ref NP_112740.1        | het   | 46 kDa  | 24 | 29 | 29 | 36 |
| 108 | Talin-1                                           | gi 81175200 sp Q9Y490 TLN1_HU      |       | 270 kDa | 0  | 34 | 10 | 28 |
| 109 | Malate dehydrogenase, mitochondrial precursor     | gi 6648067 sp P40926 MDHM_HU       |       | 36 kDa  | 44 | 3  | 15 | 4  |
| 110 | Cytokeratin-7                                     | gi 20178293 sp P08729 K2C7_HU      |       | 51 kDa  | 0  | 16 | 26 | 25 |
| 111 | ribosomal protein S17                             | gi 4506693 ref NP_001012.1         | ribos | 16 kDa  | 13 | 16 | 15 | 20 |
| 112 | voltage-dependent anion channel 1                 | gi 4507879 ref NP_003365.1         | volta | 31 kDa  | 21 | 9  | 18 | 14 |
| 113 | chaperonin containing TCP1                        | gi 48762932 ref NP_006576.2        | chape | 60 kDa  | 16 | 16 | 16 | 16 |
| 114 | ribosomal protein S15                             | gi 4506687 ref NP_001009.1         | ribos | 17 kDa  | 9  | 13 | 30 | 8  |
| 115 | Spectrin alpha                                    | gi 94730425 sp Q13813 SPTA2_H      |       | 285 kDa | 8  | 32 | 8  | 16 |
| 116 | prohibitin 2                                      | gi 6005854 ref NP_009204.1         | proh  | 33 kDa  | 28 | 9  | 20 | 3  |
| 117 | ribosomal protein S2                              | gi 15055539 ref NP_002943.2        | ribc  | 31 kDa  | 20 | 17 | 14 | 11 |
| 118 | Alpha-enolase, lung specific                      | gi 729422 sp Q05524 ENO1B_HU       |       | 49 kDa  | 12 | 16 | 16 | 16 |
| 119 | Filamin-B                                         | gi 38257363 sp O75369 FLNB_HU      |       | 278 kDa | 3  | 48 | 7  | 9  |
| 120 | actinin, alpha 4                                  | gi 12025678 ref NP_004915.2        | acti  | 105 kDa | 3  | 37 | 11 | 17 |
| 121 | CD44 antigen                                      | gi 2507241 sp P16070 CD44_HUM      |       | 82 kDa  | 0  | 30 | 0  | 33 |
| 122 | 60S ribosomal protein L14                         | gi 1710488 sp P50914 RL14_HUM      |       | 23 kDa  | 22 | 15 | 10 | 13 |
| 123 | glucose phosphate isomerase                       | gi 18201905 ref NP_000166.2        | gluc  | 63 kDa  | 12 | 8  | 25 | 15 |
| 124 | protein disulfide isomerase-associated 4          | gi 4758304 ref NP_004902.1         | prote | 73 kDa  | 37 | 8  | 5  | 12 |
| 125 | ribosomal protein L13                             | gi 15431295 ref NP_150254.1        | ribc  | 24 kDa  | 21 | 19 | 11 | 9  |
| 126 | DEAD (Asp-Glu-Ala-Asp) box polypeptide 5          | gi 4758138 ref NP_004387.1         | DEA   | 69 kDa  | 20 | 7  | 21 | 11 |
| 127 | chaperonin containing TCP1,                       | gi 5453607 ref NP_006420.1         | chape | 59 kDa  | 12 | 12 | 20 | 14 |
| 128 | ribosomal protein L32                             | gi 4506635 ref NP_000985.1         | ribos | 16 kDa  | 21 | 12 | 8  | 19 |
| 129 | NS1-associated protein 1 isoform 2 isoform 8      | gi 109071945 ref XP_001089294.1    |       | 70 kDa  | 15 | 10 | 17 | 27 |
| 130 | ribosomal protein L21                             | gi 18104948 ref NP_000973.2        | ribc  | 19 kDa  | 14 | 14 | 16 | 13 |
| 131 | S100 calcium binding protein A14                  | gi 10190712 ref NP_065723.1        | S10   | 12 kDa  | 15 | 0  | 28 | 13 |
| 132 | karyopherin beta 1                                | gi 19923142 ref NP_002256.2        | kar   | 97 kDa  | 15 | 13 | 14 | 11 |
| 133 | inosine monophosphate dehydrogenase 2             | gi 66933016 ref NP_000875.2        | inos  | 56 kDa  | 12 | 11 | 28 | 3  |
| 134 | eukaryotic translation elongation factor 2        | gi 4503483 ref NP_001952.1         | euka  | 95 kDa  | 19 | 9  | 23 | 4  |
| 135 | stomatin isoform a                                | gi 38016911 ref NP_004090.4        | sto   | 32 kDa  | 5  | 0  | 51 | 0  |
| 136 | protein disulfide isomerase-associated 6          | gi 5031973 ref NP_005733.1         | prote | 48 kDa  | 13 | 7  | 11 | 24 |
| 137 | ribosomal protein L38                             | gi 4506645 ref NP_000990.1         | ribos | 8 kDa   | 13 | 15 | 10 | 17 |
| 138 | ATP-dependent DNA helicase II                     | gi 4503841 ref NP_001460.1         | ATP   | 70 kDa  | 20 | 3  | 27 | 4  |
| 139 | histone cluster 1, H1b                            | gi 4885381 ref NP_005313.1         | histo | 23 kDa  | 16 | 7  | 10 | 21 |
| 140 | ribosomal protein S24 isoform                     | gi 4506703 ref NP_001017.1         | ribos | 15 kDa  | 15 | 9  | 19 | 12 |
| 141 | ribosomal protein S28                             | gi 4506715 ref NP_001022.1         | ribos | 8 kDa   | 21 | 10 | 13 | 8  |
| 142 | heat shock 10kDa protein 1                        | gi 4504523 ref NP_002148.1         | heat  | 11 kDa  | 14 | 9  | 20 | 11 |

|     |                                                       |                                   |         |    |    |    |    |
|-----|-------------------------------------------------------|-----------------------------------|---------|----|----|----|----|
| 143 | lamin B1                                              | gi 5031877 ref NP_005564.1  lamir | 66 kDa  | 18 | 6  | 16 | 12 |
| 144 | ribosomal protein L22 proprotein                      | gi 4506613 ref NP_000974.1  ribos | 15 kDa  | 11 | 11 | 10 | 20 |
| 145 | DEAD/H                                                | gi 87196351 ref NP_001347.3  DE   | 73 kDa  | 10 | 11 | 19 | 13 |
| 146 | splicing factor proline/glutamine rich                | gi 4826998 ref NP_005057.1  splic | 76 kDa  | 12 | 5  | 23 | 14 |
| 147 | 80K-H protein                                         | gi 182855 gb AA52493.1  80K-H     | 59 kDa  | 15 | 11 | 7  | 20 |
| 148 | chaperonin containing TCP1                            | gi 5453603 ref NP_006422.1  chap  | 57 kDa  | 13 | 9  | 20 | 9  |
| 149 | dpy-30-like protein                                   | gi 14211889 ref NP_115963.1  dpy  | 11 kDa  | 19 | 6  | 15 | 14 |
| 150 | thioredoxin peroxidase                                | gi 5453549 ref NP_006397.1  thior | 31 kDa  | 16 | 12 | 11 | 14 |
| 151 | eukaryotic translation elongation factor 1 gamma      | gi 4503481 ref NP_001395.1  euka  | 50 kDa  | 11 | 18 | 7  | 19 |
| 152 | Glucose 6-Phosphate Dehydrogenase                     | gi 7546523 pdb 1QK A Chain A, X   | 59 kDa  | 15 | 0  | 35 | 0  |
| 153 | ribosomal protein L27                                 | gi 4506623 ref NP_000979.1  ribos | 16 kDa  | 13 | 13 | 12 | 9  |
| 154 | eukaryotic translation initiation factor 4A isoform 1 | gi 4503529 ref NP_001407.1  euka  | 46 kDa  | 16 | 13 | 10 | 9  |
| 155 | peroxiredoxin 2 isoform a                             | gi 32189392 ref NP_005800.3  per  | 22 kDa  | 21 | 4  | 22 | 3  |
| 156 | high-mobility group box 1                             | gi 4504425 ref NP_002119.1  high  | 25 kDa  | 24 | 4  | 12 | 7  |
| 157 | histone H2A                                           | gi 28195394 ref NP_778235.1  hist | 14 kDa  | 10 | 3  | 29 | 5  |
| 158 | prohibitin                                            | gi 4505773 ref NP_002625.1  proh  | ?       | 27 | 5  | 15 | 0  |
| 159 | peroxiredoxin 1                                       | gi 4505591 ref NP_002565.1  pero  | 22 kDa  | 12 | 6  | 14 | 15 |
| 160 | heterogeneous nuclear ribonucleoprotein H2            | gi 9624998 ref NP_062543.1  hete  | 49 kDa  | 13 | 10 | 13 | 11 |
| 161 | chaperonin containing TCP1                            | gi 24307939 ref NP_036205.1  cha  | 60 kDa  | 13 | 10 | 19 | 5  |
| 162 | Na+/K+ -ATPase alpha 1                                | gi 21361181 ref NP_000692.2  Na   | 113 kDa | 4  | 23 | 5  | 18 |
| 163 | splicing factor, arginine/serine-rich 3               | gi 4506901 ref NP_003008.1  splic | 19 kDa  | 9  | 5  | 18 | 14 |
| 164 | ELAV-like 1                                           | gi 38201714 ref NP_001410.2  ELA  | 36 kDa  | 11 | 9  | 13 | 9  |
| 165 | ribosomal protein L5                                  | gi 14591909 ref NP_000960.2  ribd | 34 kDa  | 10 | 14 | 8  | 13 |
| 166 | ribosomal protein S21                                 | gi 4506699 ref NP_001015.1  ribos | 9 kDa   | 12 | 7  | 12 | 13 |
| 167 | Enoyl-CoA hydratase, mitochondrial                    | gi 62906863 sp P30084 ECHM_HU     | 31 kDa  | 14 | 6  | 14 | 11 |
| 168 | proteasome alpha 7 subunit                            | gi 4506189 ref NP_002783.1  prote | 28 kDa  | 7  | 21 | 7  | 8  |
| 169 | heterogeneous nuclear ribonucleoprotein F             | gi 4826760 ref NP_004957.1  hete  | 46 kDa  | 15 | 4  | 16 | 8  |
| 170 | polypyrimidine tract-binding protein 1                | gi 14165466 ref NP_114368.1  poly | 57 kDa  | 14 | 8  | 10 | 11 |
| 171 | RNA binding motif protein, X-linked                   | gi 56699409 ref NP_002130.2  RN   | 42 kDa  | 8  | 3  | 11 | 21 |
| 172 | ribosomal protein S23                                 | gi 4506701 ref NP_001016.1  ribos | 16 kDa  | 7  | 9  | 12 | 16 |
| 173 | poly(A) binding protein, cytoplasmic 3                | gi 45238849 ref NP_112241.2  poly | 70 kDa  | 15 | 11 | 11 | 9  |
| 174 | ribosomal protein S11                                 | gi 4506681 ref NP_001006.1  ribos | 18 kDa  | 11 | 13 | 5  | 13 |
| 175 | ribosomal protein L30                                 | gi 4506631 ref NP_000980.1  ribos | 13 kDa  | 17 | 8  | 3  | 18 |
| 176 | Voltage-dependent anion-selective channel protein     | gi 1172554 sp P45880 VDAC2_HU     | 38 kDa  | 12 | 7  | 6  | 18 |
| 177 | ribosomal protein L6                                  | gi 16753227 ref NP_000961.2  ribd | 33 kDa  | 16 | 6  | 11 | 11 |
| 178 | ribosomal protein L11                                 | gi 13385408 ref NP_080195.1  ribd | 20 kDa  | 7  | 14 | 7  | 17 |
| 179 | phosphoglycerate kinase 1                             | gi 4505763 ref NP_000282.1  phos  | 45 kDa  | 3  | 17 | 14 | 9  |
| 180 | ribosomal protein L13a                                | gi 6912634 ref NP_036555.1  ribos | 24 kDa  | 12 | 12 | 9  | 8  |
| 181 | anterior gradient 2 homolog                           | gi 5453541 ref NP_006399.1  ante  | 20 kDa  | 3  | 0  | 37 | 3  |
| 182 | Profilin                                              | gi 3891601 pdb 1AW A Chain A, H   | 15 kDa  | 8  | 18 | 9  | 11 |
| 183 | hypothetical protein DKFZp762H157.1                   | gi 11276938 pir T47177 hypothetic | 74 kDa  | 4  | 8  | 22 | 8  |
| 184 | ribosomal protein L27a                                | gi 4506625 ref NP_000981.1  ribos | 17 kDa  | 13 | 14 | 4  | 9  |
| 185 | eIF-5A2 protein                                       | gi 9966867 ref NP_065123.1  eIF-5 | 17 kDa  | 20 | 7  | 6  | 6  |
| 186 | endoplasmic reticulum protein 29 isoform 1            | gi 5803013 ref NP_006808.1  endo  | 29 kDa  | 10 | 3  | 16 | 11 |
| 187 | Mg-ATP Actin Complexed Gelsolin                       | gi 14278147 pdb 1D4X A Chain A,   | 42 kDa  | 4  | 6  | 14 | 14 |
| 188 | Galectin-3                                            | gi 126678 sp P17931 LEG3_HUM      | 26 kDa  | 0  | 22 | 7  | 17 |
| 189 | serine (or cysteine) proteinase inhibitor, clade H, m | gi 32454741 ref NP_001226.2  ser  | 46 kDa  | 9  | 12 | 10 | 7  |
| 190 | chaperonin containing TCP1, subunit 4                 | gi 38455427 ref NP_006421.2  cha  | 58 kDa  | 6  | 9  | 16 | 6  |
| 191 | creatine kinase, mitochondrial 1B                     | gi 10334859 ref NP_066270.1  cre  | 47 kDa  | 3  | 0  | 32 | 0  |
| 192 | calreticulin precursor                                | gi 4757900 ref NP_004334.1  calre | 48 kDa  | 6  | 9  | 12 | 10 |
| 193 | Lamin AC                                              | gi 23200154 pdb 1IVT A Chain A,   | 14 kDa  | 11 | 11 | 6  | 7  |
| 194 | solute carrier family 25, member 5                    | gi 4502099 ref NP_001143.1  solut | 33 kDa  | 10 | 0  | 7  | 21 |
| 195 | ribosomal protein S14                                 | gi 5032051 ref NP_005608.1  ribos | 16 kDa  | 10 | 9  | 10 | 5  |
| 196 | mitochondrial ribosomal protein L12                   | gi 27436901 ref NP_002940.2  mit  | 21 kDa  | 10 | 6  | 13 | 5  |
| 197 | ribosomal protein L35                                 | gi 6005860 ref NP_009140.1  ribos | 15 kDa  | 4  | 12 | 5  | 12 |
| 198 | Eukaryotic translation initiation factor 4 gamma 1    | gi 41019505 sp Q04637 IF4G1_HU    | 176 kDa | 9  | 4  | 13 | 5  |
| 199 | eukaryotic translation elongation factor 1 beta 2     | gi 4503477 ref NP_001950.1  euka  | 25 kDa  | 3  | 10 | 15 | 5  |
| 200 | ribosomal protein S19                                 | gi 4506695 ref NP_001013.1  ribos | ?       | 7  | 11 | 11 | 8  |
| 201 | ribosomal protein L26                                 | gi 4506621 ref NP_000978.1  ribos | 17 kDa  | 9  | 9  | 6  | 10 |
| 202 | THO complex 4                                         | gi 55770864 ref NP_005773.2  TH   | 27 kDa  | 10 | 4  | 13 | 6  |
| 203 | Poly [ADP-ribose] polymerase 1                        | gi 130781 sp P09874 PARP1_HUM     | 113 kDa | 3  | 3  | 22 | 7  |
| 204 | ubiquitin and ribosomal protein S27                   | gi 4506713 ref NP_002945.1  ubiq  | 18 kDa  | 5  | 15 | 7  | 9  |
| 205 | S100 calcium binding protein A16                      | gi 17933772 ref NP_525127.1  S10  | 12 kDa  | 3  | 0  | 27 | 4  |
| 206 | phosphoribosylaminoimidazole carboxylase, phos        | gi 5453539 ref NP_006443.1  phos  | 47 kDa  | 12 | 6  | 7  | 7  |
| 207 | small nuclear ribonucleoprotein polypeptide D3        | gi 4759160 ref NP_004166.1  smal  | 14 kDa  | 9  | 6  | 9  | 8  |
| 208 | cytochrome c oxidase subunit Va precursor             | gi 4758038 ref NP_004246.1  cyto  | 17 kDa  | 14 | 4  | 5  | 11 |
| 209 | ribosomal protein S16                                 | gi 4506691 ref NP_001011.1  ribos | 16 kDa  | 16 | 5  | 8  | 8  |
| 210 | ribosomal protein L28                                 | gi 13904866 ref NP_000982.2  ribd | 16 kDa  | 7  | 15 | 4  | 9  |
| 211 | ribosomal protein L23a                                | gi 17105394 ref NP_000975.2  ribd | 18 kDa  | 9  | 4  | 7  | 13 |
| 212 | splicing factor, arginine/serine-rich 1 isoform 1     | gi 5902076 ref NP_008855.1  splic | ?       | 7  | 5  | 14 | 8  |
| 213 | ribosomal protein S15a                                | gi 14165469 ref NP_001010.2  ribd | 15 kDa  | 9  | 9  | 8  | 4  |
| 214 | cathepsin D preproprotein                             | gi 4503143 ref NP_001900.1  cathy | ?       | 13 | 11 | 7  | 0  |
| 215 | 40S ribosomal protein S12                             | gi 133742 sp P25398 RS12_HUM      | 15 kDa  | 9  | 7  | 5  | 10 |

|     |                                                     |                                   |        |         |    |    |    |    |
|-----|-----------------------------------------------------|-----------------------------------|--------|---------|----|----|----|----|
| 216 | ribosomal protein S25                               | gi 4506707 ref NP_001019.1        | ribos  | 14 kDa  | 5  | 11 | 9  | 7  |
| 217 | tubulin, beta, 2                                    | gi 5174735 ref NP_006079.1        | tubu   | 50 kDa  | 9  | 7  | 13 | 0  |
| 218 | vesicle-associated membrane protein-associated p    | gi 94721252 ref NP_919415.2       | ves    | 28 kDa  | 7  | 9  | 4  | 15 |
| 219 | clathrin heavy chain 1                              | gi 4758012 ref NP_004850.1        | clath  | 192 kDa | 4  | 13 | 10 | 3  |
| 220 | Na+/K+ -ATPase alpha 2                              | gi 4502271 ref NP_000693.1        | Na+    | 112 kDa | 3  | 11 | 6  | 12 |
| 221 | glycoprotein, synaptic 2                            | gi 24475816 ref NP_612510.1       | glyc   | 36 kDa  | 0  | 10 | 3  | 18 |
| 222 | DEAD (Asp-Glu-Ala-Asp) box polypeptide 21           | gi 50659095 ref NP_004719.2       | DE     | ?       | 20 | 3  | 3  | 8  |
| 223 | tumor protein D52-like 2 isoform e                  | gi 40805860 ref NP_003279.2       | tum    | 22 kDa  | 4  | 15 | 4  | 6  |
| 224 | proteasome 26S ATPase subunit 6                     | gi 24430160 ref NP_002797.2       | pro    | 44 kDa  | 7  | 8  | 10 | 4  |
| 225 | heterogeneous nuclear ribonucleoprotein H3 isoform  | gi 14141157 ref NP_036339.1       | het    | 37 kDa  | 11 | 4  | 6  | 7  |
| 226 | T-complex protein 1 isoform a                       | gi 57863257 ref NP_110379.2       | T-c    | 60 kDa  | 5  | 6  | 12 | 7  |
| 227 | SERPINE1 mRNA binding protein 1 isoform 1           | gi 66346679 ref NP_001018077.1    |        | 45 kDa  | 9  | 4  | 10 | 4  |
| 228 | RAB1B, member RAS oncogene family                   | gi 13569962 ref NP_112243.1       | RA     | 22 kDa  | 6  | 3  | 16 | 3  |
| 229 | ribosomal protein L10                               | gi 13592053 ref NP_112362.1       | ribc   | 25 kDa  | 12 | 7  | 4  | 3  |
| 230 | proteasome 26S ATPase subunit 3                     | gi 21361144 ref NP_002795.2       | pro    | 49 kDa  | 6  | 8  | 9  | 5  |
| 231 | ribosomal protein SA                                | gi 9845502 ref NP_002286.2        | ribos  | 33 kDa  | 8  | 4  | 11 | 5  |
| 232 | ribosomal protein L3 isoform a                      | gi 4506649 ref NP_000958.1        | ribos  | 46 kDa  | 7  | 6  | 6  | 7  |
| 233 | pigpen                                              | gi 20982845 ref NP_631888.1       | pigp   | 53 kDa  | 6  | 3  | 11 | 8  |
| 234 | arginine/serine-rich splicing factor 6              | gi 20127499 ref NP_006266.2       | arg    | 40 kDa  | 7  | 5  | 8  | 8  |
| 235 | pinin, desmosome associated protein                 | gi 33356174 ref NP_002678.2       | pin    | 82 kDa  | 9  | 0  | 12 | 4  |
| 236 | Bifunctional aminoacyl-tRNA synthetase              | gi 135104 sp P07814 SYEP_HUM      |        | 163 kDa | 6  | 5  | 7  | 10 |
| 237 | ribosomal protein S26                               | gi 6981488 ref NP_037356.1        | ribos  | 13 kDa  | 6  | 7  | 5  | 9  |
| 238 | Splicing factor 3B subunit 2                        | gi 2498883 sp Q13435 SF3B2_HU     |        | 98 kDa  | 9  | 5  | 7  | 6  |
| 239 | tropomyosin 3                                       | gi 58652133 ref NP_001011674.1    |        | 33 kDa  | 5  | 4  | 5  | 15 |
| 240 | Transferrin Receptor                                | gi 6137581 pdb 1CX8 A Chain A, C  |        | 72 kDa  | 4  | 9  | 13 | 3  |
| 241 | mitochondrial ATP synthase, O subunit precursor     | gi 4502303 ref NP_001688.1        | mito   | 23 kDa  | 10 | 0  | 12 | 3  |
| 242 | Rap1a, Residues 1-167,                              | gi 1942609 pdb 1GUA A Chain A, I  |        | 19 kDa  | 9  | 7  | 6  | 3  |
| 243 | annexin 5                                           | gi 4502107 ref NP_001145.1        | anne   | 36 kDa  | 3  | 12 | 9  | 3  |
| 244 | Splicing factor 3B subunit 1                        | gi 15214275 sp Q75533 SF3B1_H     |        | 146 kDa | 11 | 4  | 8  | 4  |
| 245 | histone cluster 1, H1d                              | gi 4885377 ref NP_005311.1        | histo  | 22 kDa  | 6  | 6  | 10 | 4  |
| 246 | Putative S100 calcium-binding protein H             | gi 13431875 sp Q9UDP3 S11Y_HU     |        | 12 kDa  | 7  | 10 | 7  | 4  |
| 247 | ATP citrate lyase isoform 1                         | gi 38569421 ref NP_001087.2       | AT     | 121 kDa | 7  | 7  | 12 | 0  |
| 248 | ATP-dependent DNA helicase II                       | gi 10863945 ref NP_066964.1       | AT     | 83 kDa  | 14 | 3  | 8  | 3  |
| 249 | flotillin 1                                         | gi 5031699 ref NP_005794.1        | flotil | 47 kDa  | 7  | 11 | 7  | 3  |
| 250 | poly(rC) binding protein 1                          | gi 6754994 ref NP_035995.1        | poly   | 37 kDa  | 6  | 3  | 9  | 7  |
| 251 | solute carrier family 25                            | gi 55749577 ref NP_001142.2       | sol    | 33 kDa  | 5  | 4  | 8  | 7  |
| 252 | myosin regulatory light chain MRCL3                 | gi 5453740 ref NP_006462.1        | myos   | 20 kDa  | 0  | 14 | 4  | 7  |
| 253 | ribosomal protein P0                                | gi 4506667 ref NP_000993.1        | ribos  | 34 kDa  | 10 | 5  | 9  | 6  |
| 254 | RNA helicase A                                      | gi 1082769 pir JA47363 RNA helica |        | 142 kDa | 9  | 0  | 13 | 3  |
| 255 | cytoskeleton-associated protein 4                   | gi 19920317 ref NP_006816.2       | cyt    | 66 kDa  | 3  | 17 | 0  | 6  |
| 256 | phosphoglycerate dehydrogenase                      | gi 23308577 ref NP_006614.2       | phc    | 57 kDa  | 3  | 0  | 3  | 21 |
| 257 | Potassium-transporting ATPase alpha chain 2         | gi 20141250 sp P54707 AT12A_HU    |        | 116 kDa | 0  | 11 | 3  | 13 |
| 258 | keratin 17                                          | gi 4557701 ref NP_000413.1        | kerat  | 48 kDa  | 7  | 3  | 7  | 6  |
| 259 | tyrosine 3/tryptophan 5 -monooxygenase activatio    | gi 4507953 ref NP_003397.1        | tyros  | 28 kDa  | 5  | 8  | 7  | 5  |
| 260 | small nuclear ribonucleoprotein D1                  | gi 5902102 ref NP_008869.1        | smal   | 13 kDa  | 7  | 5  | 7  | 5  |
| 261 | ribosomal protein S9                                | gi 14141193 ref NP_001004.2       | ribc   | 23 kDa  | 9  | 8  | 5  | 5  |
| 262 | RNA binding protein                                 | gi 8051631 ref NP_057951.1        | RNA    | 32 kDa  | 3  | 6  | 7  | 7  |
| 263 | ribosomal protein L9                                | gi 15431303 ref NP_000652.2       | ribc   | 22 kDa  | 6  | 7  | 4  | 7  |
| 264 | poly(A) binding protein, cytoplasmic 1              | gi 41386798 ref NP_776993.1       | pol    | 71 kDa  | 6  | 7  | 5  | 6  |
| 265 | Ribosome-binding protein 1                          | gi 23822112 sp Q9P2E9 RRBP1_H     |        | 152 kDa | 3  | 10 | 6  | 5  |
| 266 | alpha glucosidase II alpha subunit isoform 2        | gi 38202257 ref NP_938148.1       | alp    | 107 kDa | 4  | 3  | 6  | 10 |
| 267 | heterogeneous nuclear ribonucleoprotein A0          | gi 5803036 ref NP_006796.1        | hete   | 31 kDa  | 4  | 0  | 7  | 10 |
| 268 | spectrin, beta, non-erythrocytic 1 isoform 1        | gi 112382250 ref NP_003119.2      | sp     | 275 kDa | 3  | 13 | 3  | 6  |
| 269 | splicing factor, arginine/serine-rich 9             | gi 4506903 ref NP_003760.1        | splic  | 26 kDa  | 6  | 3  | 12 | 3  |
| 270 | protein kinase, DNA-activated,                      | gi 13654237 ref NP_008835.5       | pro    | 469 kDa | 8  | 3  | 3  | 5  |
| 271 | ErbB3-binding protein 1                             | gi 124494254 ref NP_006182.2      | Er     | 44 kDa  | 11 | 3  | 4  | 3  |
| 272 | proteasome alpha 1 subunit isoform 2                | gi 4506179 ref NP_002777.1        | prote  | 30 kDa  | 8  | 7  | 0  | 4  |
| 273 | ATP synthase, H+ transporting, mitochondrial F0     | gi 5453559 ref NP_006347.1        | ATP    | 18 kDa  | 3  | 3  | 12 | 3  |
| 274 | mitochondrial trifunctional protein, alpha          | gi 20127408 ref NP_000173.2       | mit    | 83 kDa  | 10 | 3  | 7  | 0  |
| 275 | bone marrow stromal cell antigen 2                  | gi 4757876 ref NP_004326.1        | bone   | 20 kDa  | 10 | 3  | 6  | 0  |
| 276 | polymerase I and transcript release factor          | gi 42734430 ref NP_036364.2       | pol    | 43 kDa  | 0  | 19 | 0  | 0  |
| 277 | Caprin-1                                            | gi 2498733 sp Q14444 CAPR1_HU     |        | 73 kDa  | 5  | 3  | 4  | 9  |
| 278 | GTP-binding protein PTD004 isoform 1                | gi 58761500 ref NP_037473.3       | GT     | 45 kDa  | 3  | 3  | 11 | 3  |
| 279 | TBP-associated factor 15 isoform 1                  | gi 21327701 ref NP_631961.1       | TBP    | 62 kDa  | 8  | 7  | 3  | 3  |
| 280 | DEK oncogene                                        | gi 4503249 ref NP_003463.1        | DEK    | 43 kDa  | 4  | 10 | 0  | 5  |
| 281 | smooth muscle myosin heavy chain 11 isoform         | gi 13124879 ref NP_002465.1       | sm     | 227 kDa | 0  | 9  | 6  | 3  |
| 282 | hydroxysteroid (17-beta) dehydrogenase 4            | gi 4504505 ref NP_000405.1        | hydr   | 80 kDa  | 7  | 3  | 6  | 4  |
| 283 | heat shock 70kD protein binding protein             | gi 19923193 ref NP_003923.2       | hea    | 41 kDa  | 3  | 0  | 13 | 6  |
| 284 | stonin 2                                            | gi 21361863 ref NP_149095.2       | sto    | 101 kDa | 8  | 0  | 0  | 11 |
| 285 | ribosomal protein L36                               | gi 16117794 ref NP_056229.2       | ribc   | 12 kDa  | 5  | 4  | 6  | 4  |
| 286 | splicing factor, arginine/serine-rich 7             | gi 72534660 ref NP_001026854.1    |        | 27 kDa  | 3  | 6  | 5  | 7  |
| 287 | Dihydrolypopylysine-residue succinyltransferase cor | gi 1709442 sp P36957 ODO2_HU      |        | 49 kDa  | 5  | 5  | 8  | 0  |
| 288 | thioredoxin domain containing 5 isoform 1           | gi 42794771 ref NP_110437.2       | thio   | 48 kDa  | 6  | 3  | 6  | 8  |

|     |                                                        |                                     |         |    |    |    |    |
|-----|--------------------------------------------------------|-------------------------------------|---------|----|----|----|----|
| 289 | AHNAK nucleoprotein isoform 1                          | gi 61743954 ref NP_001611.1  AH     | 629 kDa | 0  | 25 | 0  | 0  |
| 290 | small inducible cytokine subfamily E, member 1         | gi 45006986 ref NP_004748.2  sma    | 34 kDa  | 7  | 3  | 3  | 4  |
| 291 | proteasome (prosome, macropain) subunit, alpha         | gi 8394076 ref NP_058979.1  prote   | 27 kDa  | 5  | 6  | 0  | 6  |
| 292 | poly(rC) binding protein 2                             | gi 61557337 ref NP_001013241.1      | 39 kDa  | 6  | 4  | 7  | 0  |
| 293 | small nuclear ribonucleoprotein polypeptide D2         | gi 4759158 ref NP_004588.1  smal    | 14 kDa  | 5  | 3  | 5  | 7  |
| 294 | Dynactin subunit 2                                     | gi 22096346 sp Q13561 DCTN2_H       | 44 kDa  | 4  | 10 | 3  | 3  |
| 295 | ubiquinol-cytochrome c reductase core protein          | gi 46593007 ref NP_003356.2  ubi    | 53 kDa  | 8  | 0  | 7  | 0  |
| 296 | Integrin beta-1 precursor                              | gi 124963 sp P05556 ITB1_HUMA       | 88 kDa  | 0  | 14 | 3  | 3  |
| 297 | Ras-GTPase-activating protein SH3-domain-binding       | gi 5031703 ref NP_005745.1  Ras-    | 52 kDa  | 4  | 4  | 3  | 6  |
| 298 | U2 (RNU2) small nuclear RNA auxiliary factor 2 iso     | gi 6005926 ref NP_009210.1  U2 (    | 54 kDa  | 5  | 3  | 5  | 4  |
| 299 | proteasome 26S non-ATPase subunit 7                    | gi 25777615 ref NP_002802.2  pro    | 37 kDa  | 7  | 5  | 4  | 3  |
| 300 | tripartite motif-containing 28 protein                 | gi 5032179 ref NP_005753.1  tripa   | ?       | 6  | 0  | 6  | 4  |
| 301 | coronin, actin binding protein, 1B                     | gi 14149734 ref NP_065174.1  cor    | 54 kDa  | 4  | 3  | 9  | 3  |
| 302 | acetyl-Coenzyme A acetyltransferase 1                  | gi 4557237 ref NP_000010.1  acety   | 45 kDa  | 0  | 11 | 5  | 0  |
| 303 | CD97 antigen isoform 1 precursor                       | gi 17978491 ref NP_510966.1  CD     | 92 kDa  | 0  | 15 | 0  | 0  |
| 304 | Heterogeneous nuclear ribonucleoprotein A1             | gi 133254 sp P09651 ROA1_HUM        | 39 kDa  | 0  | 0  | 13 | 3  |
| 305 | CD9 antigen                                            | gi 4502693 ref NP_001760.1  CD9     | 25 kDa  | 3  | 3  | 8  | 0  |
| 306 | nucleosome assembly protein 1-like 1                   | gi 4758756 ref NP_004528.1  nucle   | 45 kDa  | 5  | 6  | 4  | 0  |
| 307 | protease (prosome, macropain) 26S subunit, ATPa        | gi 6679501 ref NP_032973.1  prote   | 49 kDa  | 5  | 3  | 7  | 3  |
| 308 | nuclear mitotic apparatus protein 1                    | gi 71361682 ref NP_006176.2  nuc    | 238 kDa | 5  | 0  | 6  | 4  |
| 309 | ribosomal protein L35a                                 | gi 16117791 ref NP_000987.2  ribo   | 13 kDa  | 4  | 3  | 6  | 6  |
| 310 | nucleolar and coiled-body phosphoprotein 1             | gi 148596949 ref NP_004732.2  nu    | ?       | 6  | 0  | 8  | 4  |
| 311 | barrier to autointegration factor 1                    | gi 4502389 ref NP_003851.1  barrier | 10 kDa  | 3  | 5  | 4  | 3  |
| 312 | Myosin-1                                               | gi 13638390 sp P12882 MYH1_HU       | 223 kDa | 5  | 4  | 3  | 4  |
| 313 | ubiquinol-cytochrome c reductase hinge protein         | gi 83627705 ref NP_005995.2  ubi    | 11 kDa  | 5  | 3  | 7  | 0  |
| 314 | LYRIC (Lysine-rich CEACAM1 co-isolated protein)        | gi 56749088 sp Q86UE4 LYRIC_H       | 64 kDa  | 8  | 0  | 4  | 0  |
| 315 | triosephosphate isomerase 1                            | gi 4507645 ref NP_000356.1  triose  | 27 kDa  | 6  | 6  | 4  | 0  |
| 316 | Fructose 1,6-bisphosphatase 1                          | gi 1352403 sp P09467 F16P1_HU       | ?       | 11 | 0  | 0  | 0  |
| 317 | Epidermal Growth Factor And Receptor                   | gi 24987353 pdb 1IVO A Chain A,     | 69 kDa  | 0  | 0  | 0  | 12 |
| 318 | U5 snRNP-specific protein, 116 kD isoform 8            | gi 114666736 ref XP_001145980.1     | ?       | 5  | 0  | 6  | 0  |
| 319 | eukaryotic translation initiation factor 2 beta        | gi 29826335 ref NP_003899.2  euk    | 38 kDa  | 3  | 7  | 4  | 3  |
| 320 | dynein, cytoplasmic, heavy polypeptide 1               | gi 33350932 ref NP_001367.2  dyn    | 532 kDa | 0  | 9  | 4  | 0  |
| 321 | RuvB-like 2                                            | gi 5730023 ref NP_006657.1  RuvB    | 51 kDa  | 8  | 0  | 4  | 0  |
| 322 | ATP-dependent RNA helicase DDX17                       | gi 3122595 sp Q92841 DDX17_HU       | 72 kDa  | 3  | 3  | 7  | 6  |
| 323 | sarcomeric mitochondrial creatine kinase precursor     | gi 153251982 ref NP_001816.2  sa    | 48 kDa  | 4  | 0  | 8  | 0  |
| 324 | mitochondrial trifunctional protein,                   | gi 4504327 ref NP_000174.1  mito    | 51 kDa  | 8  | 3  | 3  | 0  |
| 325 | eukaryotic translation elongation factor 1 alpha 2     | gi 4503475 ref NP_001949.1  euka    | 50 kDa  | 5  | 0  | 7  | 0  |
| 326 | S-adenosylhomocysteine hydrolase                       | gi 9951915 ref NP_000678.1  S-ad    | 48 kDa  | 4  | 5  | 8  | 0  |
| 327 | Histocompatibility Antigen A2                          | gi 229994 pdb 1HLA A Chain A, Hu    | 31 kDa  | 0  | 11 | 0  | 0  |
| 328 | hypothetical protein LOC51493                          | gi 7657015 ref NP_055121.1  hypo    | 55 kDa  | 4  | 0  | 6  | 3  |
| 329 | annexin VI isoform 1                                   | gi 71773329 ref NP_001146.2  anr    | 76 kDa  | 0  | 4  | 6  | 0  |
| 330 | LUC7-like 2                                            | gi 116812577 ref NP_057103.2  LU    | 47 kDa  | 6  | 3  | 4  | 0  |
| 331 | HLA-B associated transcript 1                          | gi 4758112 ref NP_004631.1  HLA     | 49 kDa  | 0  | 3  | 3  | 7  |
| 332 | sequestosome 1                                         | gi 4505571 ref NP_003891.1  sequ    | ?       | 0  | 7  | 3  | 3  |
| 333 | calmodulin 2                                           | gi 4502549 ref NP_001734.1  calmo   | 17 kDa  | 5  | 0  | 6  | 0  |
| 334 | amily with sequence similarity 62                      | gi 14149680 ref NP_056107.1  fam    | 123 kDa | 5  | 6  | 0  | 3  |
| 335 | B-cell receptor-associated protein 31                  | gi 32171186 ref NP_005736.3  B-c    | 28 kDa  | 4  | 3  | 6  | 4  |
| 336 | Dihydropyridyl dehydrogenase,                          | gi 118674 sp P09622 DLDP_HUM        | ?       | 9  | 0  | 3  | 0  |
| 337 | sulfide dehydrogenase like                             | gi 10864011 ref NP_067022.1  sulf   | 50 kDa  | 0  | 0  | 10 | 0  |
| 338 | solute carrier family 25                               | gi 21389315 ref NP_005975.1  sol    | ?       | 0  | 0  | 10 | 0  |
| 339 | FK506-binding protein 4                                | gi 4503729 ref NP_002005.1  FK5     | ?       | 6  | 0  | 7  | 0  |
| 340 | basigin isoform 1                                      | gi 38372919 ref NP_001719.2  bas    | 42 kDa  | 0  | 11 | 0  | 0  |
| 341 | heterogeneous nuclear ribonucleoprotein U-like 2       | gi 118601081 ref NP_001073027.1     | 85 kDa  | 0  | 0  | 4  | 5  |
| 342 | fibrillarin                                            | gi 12056465 ref NP_001427.2  fibr   | 34 kDa  | 4  | 3  | 3  | 5  |
| 343 | tyrosine 3-monooxygenase/tryptophan 5-monooxy          | gi 4507949 ref NP_003395.1  tyros   | 28 kDa  | 0  | 4  | 3  | 5  |
| 344 | proteasome 26S non-ATPase subunit 4                    | gi 5292161 ref NP_002801.1  prote   | 41 kDa  | 4  | 4  | 3  | 4  |
| 345 | splicing coactivator subunit SRm300                    | gi 118572613 ref NP_057417.3  sp    | ?       | 3  | 0  | 8  | 0  |
| 346 | SEB4B protein -                                        | gi 481241 pir S38383 SEB4B prot     | 25 kDa  | 4  | 8  | 3  | 4  |
| 347 | Erythrocyte Catalase 3-Amino-1,2,4-Triazole Com        | gi 7245757 pdb 1DGH B Chain B,      | 57 kDa  | 0  | 0  | 0  | 10 |
| 348 | proteasome 26S non-ATPase subunit 1                    | gi 25777600 ref NP_002798.2  pro    | ?       | 4  | 5  | 5  | 3  |
| 349 | epidermal growth factor receptor                       | gi 29725609 ref NP_005219.2  epi    | 134 kDa | 0  | 0  | 0  | 10 |
| 350 | Tripartite motif-containing protein 25 (Zinc finger pr | gi 12585547 sp Q14258 TRI25_HU      | 71 kDa  | 6  | 3  | 3  | 0  |
| 351 | ribosomal protein L31 isoform 1                        | gi 4506633 ref NP_000984.1  ribos   | 14 kDa  | 5  | 0  | 5  | 0  |
| 352 | high mobility group AT-hook 1 isoform a                | gi 22208967 ref NP_665906.1  hig    | 12 kDa  | 4  | 7  | 0  | 0  |
| 353 | Barrier-To-Autointegration Factor                      | gi 10120888 pdb 1CI4 A Chain A,     | ?       | 3  | 3  | 7  | 3  |
| 354 | RAB7, member RAS oncogene family                       | gi 34147513 ref NP_004628.4  RA     | ?       | 3  | 3  | 7  | 3  |
| 355 | Double-stranded RNA-specific adenosine deamin          | gi 38372880 sp P55265 DSRAD_H       | 136 kDa | 5  | 0  | 5  | 0  |
| 356 | Integrin beta-4 precursor                              | gi 13638154 sp P16144 ITB4_HUM      | ?       | 0  | 9  | 0  | 0  |
| 357 | A Novel Anti-Tumor Cytokine Contains A Rna-Bind        | gi 10120516 pdb 1EUJA A Chain A,    | 18 kDa  | 4  | 0  | 0  | 8  |
| 358 | BCL2-associated athanogene 2                           | gi 4757834 ref NP_004273.1  BCL     | 24 kDa  | 0  | 9  | 0  | 0  |
| 359 | progesterone receptor membrane component 1             | gi 5729875 ref NP_006658.1  prog    | 22 kDa  | 0  | 0  | 5  | 8  |
| 360 | H1 histone family, member 0                            | gi 4885371 ref NP_005309.1  H1 h    | 21 kDa  | 0  | 0  | 8  | 0  |
| 361 | ARP3 actin-related protein 3 homolog                   | gi 5031573 ref NP_005712.1  ARP     | 47 kDa  | 0  | 3  | 4  | 3  |

|     |                                                         |                                   |         |   |    |   |   |
|-----|---------------------------------------------------------|-----------------------------------|---------|---|----|---|---|
| 362 | glutamate dehydrogenase 2                               | gi 3137775 ref NP_036216.2  glu   | ?       | 4 | 3  | 4 | 0 |
| 363 | SEC22 vesicle trafficking protein-like 1                | gi 6755448 ref NP_035472.1  SEC   | 25 kDa  | 0 | 3  | 5 | 3 |
| 364 | signal recognition particle 14kDa                       | gi 14999611 ref NP_003125.3  sig  | 15 kDa  | 3 | 3  | 5 | 0 |
| 365 | far upstream element-binding protein                    | gi 17402900 ref NP_003893.2  far  | 68 kDa  | 4 | 0  | 4 | 3 |
| 366 | cleavage and polyadenylation specific factor 6,         | gi 5901928 ref NP_008938.1  cleav | ?       | 4 | 0  | 5 | 0 |
| 367 | homeobox prox 1                                         | gi 7706322 ref NP_057123.1  hom   | 28 kDa  | 0 | 3  | 6 | 0 |
| 368 | RNA binding motif protein 39 isoform a                  | gi 35493811 ref NP_909122.1  RN   | 59 kDa  | 3 | 0  | 6 | 0 |
| 369 | fumarate hydratase precursor                            | gi 19743875 ref NP_000134.2  fum  | 55 kDa  | 0 | 0  | 6 | 4 |
| 370 | vinculin isoform meta-VCL                               | gi 7669550 ref NP_054706.1  vincu | 124 kDa | 0 | 7  | 0 | 3 |
| 371 | epidermal autoantigen 450K                              | gi 1082355 pir PH0269 epidermal   | 31 kDa  | 0 | 7  | 0 | 0 |
| 372 | dihydropyrimidinase-like 2                              | gi 4503377 ref NP_001377.1  dihyd | 62 kDa  | 0 | 7  | 0 | 0 |
| 373 | Filamin-B (FLN-B)                                       | gi 38257363 sp O75369 FLNB_HU     | ?       | 0 | 7  | 0 | 0 |
| 374 | RuvB-like 1                                             | gi 4506753 ref NP_003698.1  RuvB  | 50 kDa  | 7 | 0  | 3 | 0 |
| 375 | Annexin I At 2.5                                        | gi 157829895 pdb 1AIN A Chain A   | 35 kDa  | 0 | 12 | 0 | 0 |
| 376 | eukaryotic translation initiation factor 3              | gi 4503525 ref NP_003743.1  euka  | ?       | 4 | 0  | 3 | 3 |
| 377 | ribonucleoprotein                                       | gi 2136118 pir  56013 ribonucleop | 11 kDa  | 4 | 3  | 4 | 0 |
| 378 | prefoldin subunit 2                                     | gi 12408675 ref NP_036526.2  pre  | 17 kDa  | 0 | 3  | 5 | 3 |
| 379 | receptor accessory protein 5                            | gi 115430112 ref NP_005660.4  re  | 21 kDa  | 0 | 0  | 5 | 3 |
| 380 | brain creatine kinase                                   | gi 21536286 ref NP_001814.2  bra  | 43 kDa  | 0 | 0  | 6 | 0 |
| 381 | splicing factor, arginine/serine-rich 2                 | gi 6755478 ref NP_035488.1  splic | 25 kDa  | 0 | 0  | 6 | 3 |
| 382 | sterol carrier protein 2 isoform 1                      | gi 19923233 ref NP_002970.2  ste  | 59 kDa  | 0 | 0  | 6 | 3 |
| 383 | thrombospondin 1 precursor                              | gi 40317626 ref NP_003237.2  thrd | ?       | 0 | 0  | 7 | 0 |
| 384 | ADP-ribosylation-like factor 6 interacting protein 5    | gi 5453704 ref NP_006398.1  ADP   | 22 kDa  | 0 | 0  | 7 | 0 |
| 385 | PRP3 pre-mRNA processing factor 3 homolog               | gi 4758556 ref NP_004689.1  PRP   | ?       | 6 | 0  | 0 | 0 |
| 386 | proteasome 26S ATPase subunit 2                         | gi 4506209 ref NP_002794.1  prote | ?       | 4 | 3  | 3 | 0 |
| 387 | heat shock 105kD                                        | gi 42544159 ref NP_006635.2  hea  | ?       | 3 | 0  | 4 | 0 |
| 388 | ATP synthase, H+ transporting,                          | gi 18644883 ref NP_001676.2  AT   | 13 kDa  | 3 | 0  | 4 | 3 |
| 389 | splicing factor 3a, subunit 3                           | gi 5803167 ref NP_006793.1  splic | 59 kDa  | 4 | 0  | 3 | 3 |
| 390 | tenascin N                                              | gi 62988324 ref NP_071376.1  ten  | 144 kDa | 0 | 3  | 0 | 4 |
| 391 | splicing factor, arginine/serine-rich 11                | gi 4759100 ref NP_004759.1  splic | 54 kDa  | 0 | 0  | 5 | 0 |
| 392 | proteasome beta 1 subunit                               | gi 4506193 ref NP_002784.1  prote | 26 kDa  | 5 | 3  | 0 | 0 |
| 393 | Integrin alpha-3 precursor (Galactoprotein B3)          | gi 11467963 sp P26006 ITA3_HUM    | 119 kDa | 0 | 6  | 3 | 0 |
| 394 | FK506-binding protein 3                                 | gi 4503727 ref NP_002004.1  FK5   | ?       | 4 | 0  | 4 | 0 |
| 395 | ribosomal L1 domain containing 1                        | gi 118498359 ref NP_056474.2  rib | 55 kDa  | 5 | 0  | 3 | 0 |
| 396 | eukaryotic translation initiation factor 2-alpha kinase | gi 4506103 ref NP_002750.1  euka  | 62 kDa  | 5 | 0  | 0 | 0 |
| 397 | solute carrier family 1                                 | gi 5032093 ref NP_005619.1  solu  | 57 kDa  | 0 | 0  | 5 | 3 |
| 398 | gelsolin isoform a precursor                            | gi 4504165 ref NP_000168.1  gels  | ?       | 0 | 5  | 0 | 3 |
| 399 | Topoisomerase I Ara-C Complex                           | gi 28948850 pdb 1NH3 A Chain A,   | 66 kDa  | 6 | 0  | 0 | 0 |
| 400 | ubiquinol-cytochrome c reductase binding protein        | gi 5454152 ref NP_006285.1  ubiq  | 14 kDa  | 0 | 0  | 7 | 0 |
| 401 | pyrroline-5-carboxylate reductase 1 isoform 1           | gi 24797097 ref NP_008838.2  pyr  | ?       | 3 | 0  | 4 | 0 |
| 402 | stauferin isoform b                                     | gi 82659087 ref NP_059347.2  sta  | 63 kDa  | 0 | 4  | 0 | 3 |
| 403 | ribonuclease/angiogenin inhibitor                       | gi 21361547 ref NP_002930.2  ribc | 50 kDa  | 0 | 0  | 4 | 0 |
| 404 | Protein FAM62B Extended synaptotagmin-2                 | gi 121949310 sp A0FGR8 FA62B_     | ?       | 0 | 4  | 0 | 0 |
| 405 | Pp2a, Pr65alpha                                         | gi 4558258 pdb 1B3U A Chain A, C  | 65 kDa  | 3 | 0  | 4 | 0 |
| 406 | myoferlin isoform a                                     | gi 7305053 ref NP_038479.1  myof  | 235 kDa | 0 | 4  | 0 | 0 |
| 407 | guanine nucleotide binding protein (G protein), alp     | gi 4504041 ref NP_002061.1  guar  | 40 kDa  | 0 | 4  | 0 | 0 |
| 408 | cytokine induced protein 29 kDa                         | gi 32129199 ref NP_149073.1  cyt  | 24 kDa  | 0 | 0  | 4 | 0 |
| 409 | VAMP-associated protein B/C                             | gi 4759302 ref NP_004729.1  VAM   | 27 kDa  | 0 | 0  | 4 | 0 |
| 410 | arsenate resistance protein ARS2 isoform a              | gi 58331218 ref NP_056992.4  ars  | 101 kDa | 3 | 0  | 4 | 0 |
| 411 | catenin, delta 1 isoform 1ABC                           | gi 146231940 ref NP_001078927.1   | ?       | 3 | 0  | 0 | 4 |
| 412 | coiled-coil-helix-coiled-coil-helix domain containing   | gi 8923390 ref NP_060282.1  coile | 26 kDa  | 0 | 4  | 0 | 3 |
| 413 | ATP synthase, H+ transporting,                          | gi 6005717 ref NP_009031.1  ATP   | ?       | 0 | 0  | 4 | 0 |
| 414 | minichromosome maintenance complex component            | gi 33356547 ref NP_004517.2  min  | ?       | 4 | 0  | 3 | 0 |
| 415 | S100 calcium-binding protein A8                         | gi 21614544 ref NP_002955.2  S10  | 11 kDa  | 0 | 0  | 0 | 4 |
| 416 | ribosomal protein L14                                   | gi 7513316 pir JC5954 ribosomal   | 24 kDa  | 0 | 6  | 0 | 0 |
| 417 | DAZ associated protein 1 isoform b                      | gi 25470886 ref NP_061832.2  DA   | 43 kDa  | 0 | 0  | 5 | 0 |
| 418 | emerin                                                  | gi 4557553 ref NP_000108.1  eme   | 29 kDa  | 0 | 0  | 5 | 0 |
| 419 | 5' nucleotidase, ecto                                   | gi 4505467 ref NP_002517.1  5' nu | ?       | 0 | 5  | 0 | 0 |
| 420 | HUMAN 2-oxoglutarate dehydrogenase E1 compo             | gi 1352618 sp Q02218 ODO1_HU      | ?       | 0 | 0  | 4 | 0 |
